# Supplementary material for: A revised prosocial behavior game: Testing associations with psychopathic traits and the effects of moral elevation using a randomized clinical trial
Source: PLoS One. 2023 Apr 19;18(4):e0283279. doi: 10.1371/journal.pone.0283279 (PMC10115303; doi:10.1371/journal.pone.0283279)
Supplement: S2 File — (DOCX) [file pone.0283279.s002.docx]

| SUPPLEMENTAL TABLE 1. Pearson Correlation Matrix of AlAn’s Game Trials and Levenson Self Report Psychopathy Scale Scores (all *p-values* <0.001; n=485) | | | | | | | | | | |
| --- | --- | --- | --- | --- | --- | --- | --- | --- | --- | --- |
|  | Prosocial Behavior Trial Type A1 (number rejected, Run 1) | Prosocial Behavior Trial Type B2 (number accepted, Run 1) | Prosocial Behavior Both Trial Types combined (Run 1) | Prosocial Behavior Trial Type A (number rejected, Run 2) | Prosocial Behavior Trial Type B (number accepted, Run 2) | Prosocial Behavior Both Trial Types combined (Run 2) | Prosocial Behavior Both Trial Types Combined (Runs 1 and 2) | Levenson Factor 1 Score | Levenson Factor 2 Score | Levenson Total Score |
| Prosocial Behavior Trial Type A (Run 1) | 1 | *r*=0.71 | *r*=0.93; | *r*=0.90 | *r*=0.72 | *r*=0.87 | *r*=0.92 | *r*= -0.50 | *r*= -0.30 | *r*= -0.47 |
| Prosocial Behavior Trial Type B (Run 1) |  | 1 | *r*=0.92 | *r*=0.68 | *r*=0.88 | *r*=0.84 | *r*=0.90 | *r*= -0.46 | *r*= -0.32 | *r*= -0.46 |
| Prosocial Behavior Both Trial Types combined (Run 1) |  |  | 1 | *r*=0.86 | *r*=0.86 | *r*=0.92 | *r*=0.98 | *r*= -0.52 | *r*= -0.33 | *r*= -0.50 |
| Prosocial Behavior Trial Type A (Run 2) |  |  |  | 1 | *r*=0.74 | *r*=0.94 | *r*=0.92 | *r*= -0.49 | *r*= -0.29 | *r*= -0.46 |
| Prosocial Behavior Trial Type B (Run 2) |  |  |  |  | 1 | *r*=0.93 | *r*=0.91 | *r*= -0.44 | *r*= -0.34 | *r*= -0.45 |
| Prosocial Behavior Both Trial Types combined (Run 2) |  |  |  |  |  | 1 | *r*=0.98 | *r*= -0.50 | *r*= -0.33 | *r*= -0.49 |
| Prosocial Behavior Both Trial Types Combined (Runs 1 and 2) |  |  |  |  |  |  | 1 | *r*= -0.52 | *r*= -0.34 | *r*= -0.51 |
| Levenson Factor One Score |  |  |  |  |  |  |  | 1 | *r*=0.57 | *r*=0.94 |
| Levenson Factor Two Score |  |  |  |  |  |  |  |  | 1 | *r*=0.82 |

1 Trial Type A = where the participant will gain money but the Red Cross donation will lose money. Prosocial behavior for these trials is defined as the number of trials rejected.

2 Trial Type B = where the participant will lose money but the Red Cross donation will gain money. Prosocial behavior for these trials is defined as the number of trial accepted.

| SUPPLEMENTAL TABLE 2. Pearson Correlation Matrix of AlAn’s Game Trials and Levenson Self Report Psychopathy Scale Scores within females (n=246) above, within and males (n=239); all *p-values*<0.001. | | | | | | | | | | |
| --- | --- | --- | --- | --- | --- | --- | --- | --- | --- | --- |
|  | Prosocial Behavior Trial Type A (number rejected, Run 1) | Prosocial Behavior Trial Type B (number accepted, Run 1) | Prosocial Behavior Both Trial Types combined (Run 1) | Prosocial Behavior Trial Type A (number rejected, Run 2) | Prosocial Behavior Trial Type B (number accepted, Run 2) | Prosocial Behavior Both Trial Types combined (Run 2) | Prosocial Behavior Both Trial Types Combined (Runs 1 and 2) | Levenson Factor 1 Score | Levenson Factor 2 Score | Levenson Total Score |
| Prosocial Behavior Trial Type A (Run 1) | 1 | *rMALE*=0.75  *rFEMALE*=0.68 | *rMALE*=0.94  *rFEMALE*=0.92 | *rMALE*=0.91  *rFEMALE*=0.89 | *rMALE*=0.72  *rFEMALE*=0.71 | *rMALE*=0.88  *rFEMALE*=0.87 | *rMALE*=0.92  *rFEMALE*=0.91 | *rMALE*= -0.31  *rFEMALE*= -0.66 | *rMALE*= -0.24  *rFEMALE*= -0.36 | *rMALE*= -0.32  *rFEMALE*= -0.61 |
| Prosocial Behavior Trial Type B (Run 1) |  | 1 | *rMALE*=0.93  *rFEMALE*=0.91 | *rMALE*=0.71  *rFEMALE*=0.66 | *rMALE*=0.89  *rFEMALE*=0.87 | *rMALE*=0.85  *rFEMALE*=0.82 | *rMALE*=0.91  *rFEMALE*=0.88 | *rMALE*= -0.36  *rFEMALE*= -0.54 | *rMALE*= -0.27  *rFEMALE*= -0.36 | *rMALE*= -0.37  *rFEMALE*= -0.53 |
| Prosocial Behavior Both Trial Types combined (Run 1) |  |  | 1 | *rMALE*=0.87  *rFEMALE*=0.85 | *rMALE*=0.86  *rFEMALE*=0.86 | *rMALE*=0.92  *rFEMALE*=0.92 | *rMALE*=0.98  *rFMEALE*=0.98 | *rMALE*= -0.36  *rFMEALE*= -0.65 | *rMALE*= -0.27  *rFEMALE*= -0.40 | *rMALE*= -0.37  *rFEMALE*= -0.63 |
| Prosocial Behavior Trial Type A (Run 2) |  |  |  | 1 | *rMALE*=0.74  *rFEMALE*=0.74 | *rMALE*=0.93  *rFEMALE*=0.94 | *rMALE*=0.92  *rFEMALE*=0.91 | *rMALE*= -0.32  *rFEMALE*= -0.64 | *rMALE*= -0.24  *rFEMALE*= -0.34 | *rMALE*= -0.32  *rFEMALE*= -0.59 |
| Prosocial Behavior Trial Type B (Run 2) |  |  |  |  | 1 | *rMALE*=0.93  *rFEMALE*=0.93 | *rMALE*=0.91  *rFEMALE*=0.91 | *rMALE*= -0.36  *rFEMALE*= -0.53 | *rMALE*= -0.29  *rFEMALE*= -0.39 | *rMALE*= -0.37  *rFEMALE*= -0.53 |
| Prosocial Behavior Both Trial Types combined (Run 2) |  |  |  |  |  | 1 | *rMALE*=0.98  *rFEMALE*=0.98 | *rMALE*= -0.36  *rFEMALE*= -0.63 | *rMALE*= -0.28  *rFEMALE*= -0.39 | *rMALE*= -0.37  *rFMEALE*= -0.60 |
| Prosocial Behavior Both Trial Types Combined (Runs 1 and 2) |  |  |  |  |  |  | 1 | *rMALE*= -0.37  *rFEMALE*= -0.65 | *rMALE*= -0.28  *rFEMALE*= -0.40 | *rMALE*= -0.38  *rFEMALE*= -0.63 |
| Levenson Factor One Score |  |  |  |  |  |  |  | 1 | *rMALE*=0.57  *rFEMALE*=0.57 | *rMALE*=0.93  *rFEMALE*=0.94 |
| Levenson Factor Two Score |  |  |  |  |  |  |  |  | 1 | *rMALE*=0.83  *rFEMALE*=0.81 |
| Levenson Total Score |  |  |  |  |  |  |  |  |  | 1 |

Trial Type A = where the participant will gain money but the Red Cross donation will lose money. Prosocial behavior for these trials is defined as the number of trials rejected.

Trial Type B = where the participant will lose money but the Red Cross donation will gain money. Prosocial behavior for these trials is defined as the number of trial accepted.
